# Supplementary material for: Mutations or copy number losses of CD58 and TP53 genes in diffuse large B cell lymphoma are independent unfavorable prognostic factors
Source: PubMed Central journal article supplement (PMC5347770; doi:10.18632/oncotarget.13065), 2016-11-04
Supplement: oncotarget-07-83294-s001.pdf [file oncotarget-07-83294-s001.pdf]

## Mutations or copy number losses of *CD58* and *TP53* genes in diffuse large B cell lymphoma are independent unfavorable prognostic factors

### SUPPLEMENTARY MATERIALS AND METHODS

#### Mutation validation

A total of 394 variants of 27 genes in 196 DLBCL samples were detected by the next generation sequencing approach and confirmed by bidirectional Sanger sequencing. Genomic DNA was amplified by PCR using the high fidelity and efficient PCR enzyme KOD FX (TOYOBO)

and sequenced using a 3500 Genetic Analyzer (Life Technologies) with a BigDye® Direct Cycle Sequencing Kit (Life Technologies). The analysis of chromatogram data was manually performed on Chromas (Technelysium Pty Ltd) and DNA Baser Sequence Assembler v4 (HeracleBioSoft). All primer sequences ordered from TsingKe, Wuhan, China are summarized as follows.

| Primers names     | Primers sequences                  |
|-------------------|------------------------------------|
| $\beta_2$ M -E1-F | TCC CTC TCT CTA ACC TGG CAC        |
| $\beta_2$ M -E1-R | ACT TGG AGA AGG GAA GTC ACG        |
| $\beta_2$ M -E2-F | AGC TTG ACA CCA AGT TAG CCC        |
| $\beta_2$ M -E2-R | GAT GGG ATG GGA CTC ATT CAG        |
| $\beta_2$ M -E3-F | GAG GCT AGT AGG AAG GGC TTG        |
| $\beta_2$ M -E3-R | CAC TCC ACA GGA GAA GGG AAC        |
| BCL2-E2-1-F       | CCA AGA ATG CAA AGC ACA TCC        |
| BCL2-E2-1-R       | CCC AGC CTC CGTTAT CCT G           |
| BCL2-E2-2-F       | TGG AGG AGC TCT TCA GGG AC         |
| BCL2-E2-2-R       | TTG TCC AGA GGA GGA GGT AGG        |
| BCL6-E4-F         | CCG TAG AAG TTC TGG AGG TAG G      |
| BCL6-E4-R         | TGT GGG TTG CAG CAT ATC ATA G      |
| BCL6-E5-F         | ATT CCA TGT ACA GCC ACC TCC        |
| BCL6-E5-R         | GAG GAT GCA GGC ATT CTT ACT G      |
| BCL6-E7-F         | ACA GAG GAG AGC GGC CTT AG         |
| BCL6-E7-R         | CAC TAA GCA AAG ACA AGA CAG GG     |
| BCL6-E8-F         | CTT AGA AAT CCA GGA GCC ACG        |
| BCL6-E8-R         | GGA CTG AGT GGG ACT TTC TCC        |
| BRAF-E10-F        | TTT GGC CCA TCC TTT CCA            |
| BRAF-E10-R        | GCA GTG CCG TAG AAA TAT GCT T      |
| BRAF-E14-F        | CAT GGA TAA ATA GGC TTG ACT GG     |
| BRAF-E14-R        | CCT ATA CAT GCA TGC ACA ATC C      |
| BRAF-E15-F        | TCA TCC TAA CAC ATT TCA AGC C      |
| BRAF-E15-R        | TTT GTG AAT ACT GGG AAC TAT GAA A  |
| BRAF-E2-F         | GAG GAA CAC TGG CAG TTA CTG TG     |
| BRAF-E2-R         | TCT CTT CCC AAA TCT ATT CCT AAT CC |

(Continued)

| Primers names | Primers sequences                     |
|---------------|---------------------------------------|
| BRAF-E4-F     | TGG TGT TGT ATC TGA CCT AGT AAC CC    |
| BRAF-E4-R     | CCT CAT ATG GCC TAC AGT ATT TCT TC    |
| CARD11-E10-F  | GTA AGA AGC GAG TCG CAG GA            |
| CARD11-E10-R  | TTG TAC AAG AAG ACC GGG GC            |
| CARD11-E13-F  | TAA GGA GGC TTG GCA TGG TG            |
| CARD11-E13-R  | AAT TGA GTC CCT GCG TGT GT            |
| CARD11-E16-F  | CTT CTC GGA GCC AGG ACA C             |
| CARD11-E16-R  | ATG GCT GAA TGC AAG GCT TAG           |
| CARD11-E19-F  | AGA CAC CAA CCC CTT GTC CT            |
| CARD11-E19-R  | AGT CCT CGA AGG CAA GCA TC            |
| CARD11-E20-F  | AAG AAA GCG TTA GCA TGG AGG           |
| CARD11-E20-R  | GAC AGG AGA TGT GAG GCA CTG           |
| CARD11-E23-F  | ATT TAA ACA TGG CTG GAA GGG           |
| CARD11-E23-R  | AAA CAA CTC TTC ATC CCA CCC           |
| CARD11-E4-F   | GAT TTA CGT CAT CTG GGC TCC           |
| CARD11-E4-R   | GAA CCA TGC CAC TAC TGA GGA C         |
| CARD11-E5-F   | AGT GAG TGA ATG AAT GGC ACC           |
| CARD11-E5-R   | TTA TGG GAG AAT TGA GCC CTG           |
| CARD11-E6-F   | GAG GCA CGG AGC TTA CAG TT            |
| CARD11-E6-R   | AAA CCC ATC AGA GAA GGG CG            |
| CARD11-E8-F   | CGA GCA GAG AAC AGC TTT CAG           |
| CARD11-E8-R   | AGG AGT GAT CCC TGC ATT GTC           |
| CARD11-E9-F   | GAA GGT AGT GAC TGA CAC GCC           |
| CARD11-E9-R   | GGA GCC ATT CAT TGC ACA G             |
| CD58-E1-F     | CGT AGG CGG TGC TTG AAC               |
| CD58-E1-R     | CTG ACT CCA TGA GGG ACA CTG           |
| CD58-E2-F     | TTG TGT CAG CAG TTT GTC AGC           |
| CD58-E2-R     | TCT CAT AGA CCA TTA ATT TGT GCT AGT C |
| CD58-E3-F     | TGT CTG CTC ATC CTT TCA AGC           |
| CD58-E3-R     | GAA AGC CTC CAT GAC ACA TTT A         |
| CD58-E4-F     | TCT GAG AAT GAC TGC TTT GGG           |
| CD58-E4-R     | AGC AGT CCC ACA CAC GTA AAG           |
| CD58-E5-F     | TGA ACA ACT CTT TGG ACC AGC           |
| CD58-E5-R     | ATC TGG CTT CCC AAG TAA TGG           |
| CD58-E6-F     | ACT CAA GGC AGT TCT TCC TCC           |
| CD58-E6-R     | GCA GCT GCT TCA AGT TAC ATT TC        |
| CD79B-E3-F    | AAG GAC TAA GCC CAG GGA GTC           |

(Continued)

| Primers names | Primers sequences               |
|---------------|---------------------------------|
| CD79B-E3-R    | ACC ATC ACC ACA AGA GGC AG      |
| CD79B-E4-F    | GCA GAA GTG CAA CAA CAC CTC     |
| CD79B-E4-R    | ACC AAG AAG GCC ACA ACG AG      |
| CD79B-E5-F    | TGT TCT TGC AGA ATG CAC CTC     |
| CD79B-E5-R    | TAG GTG GCT GTC TGG TCA ATG     |
| CD79B-E6-F    | CACCTACGAGGTAAGGAGAGGG          |
| CD79B-E6-R    | CTG GAG ACA AAT GGC AGC TC      |
| CD83-E3-F     | AAC ATA AGT TGA GGC TGG ATC TTC |
| CD83-E3-R     | TTT CAG CCA CAG ATG TGA TCC     |
| CIITA-E11-1-F | GTG TCA CAT GTC TGT GGT CCC     |
| CIITA-E11-1-R | AGC ACA GCA ATC ACT CGT GTC     |
| CIITA-E11-2-F | AGA CAC GAG TGA TTG CTG TGC     |
| CIITA-E11-2-R | GCT GTG GCT GTG ACT GAG AAG     |
| CIITA-E11-3-F | AGT GGC GAA ATC AAG GAC AAG     |
| CIITA-E11-3-R | GCA GTT AAT GCC CAA CAC AAG     |
| CIITA-E17-F   | TCT GGA ATC TAG GGA TGG TGG     |
| CIITA-E17-R   | GCA AGA GAA ACT CAC CTT GGG     |
| CIITA-E18-F   | AAT AAC TGC ATC TGC GAC GTG     |
| CIITA-E18-R   | AGG GAA GAG CAT GAT TTG AGC     |
| CIITA-E1-F    | GCT AGT GAT GAG GCT GTG TGC     |
| CIITA-E1-R    | CTC CGG TGG AAG GAA ATA GAC     |
| CIITA-E2-F    | ATG TGG CTT GCT CTC TCC AC      |
| CIITA-E2-F    | CCA GCT GGG AGT TGT TGT AGG     |
| CIITA-E2-R    | GGA CCA GAA TTT CCC CTG AT      |
| CIITA-E2-R    | AAT TTC TGG AAA GAG GGC TGG     |
| CIITA-E3-F    | TGC TGT AGA GAC GGC AAT CAG     |
| CIITA-E3-R    | TTG CAA TGA TTT CTG TGG GAG     |
| CIITA-E4-F    | CCT GGA GTG TCA GTG TTC ATT C   |
| CIITA-E4-R    | GTC GTC AGG TAT TAG GGC ACC     |
| CIITA-E7-F    | AGA CAT CCA TGC CAC TCC AG      |
| CIITA-E7-R    | CCC TGC CTT AGT GTC AAC TCC     |
| CIITA-E8-F    | GGG CAG GAC AGA AAC AGC TAC     |
| CIITA-E8-R    | GAC AGA GAA AGT TGT GCT GGG     |
| EP300-E2-F    | CCT CAA TAT GGG AGT TGG TGG     |
| EP300-E2-R    | ACA ATG TAA GGC AAA CCC TCC     |
| EP300-E8-F    | CCC TGC CTA GCT CCT TAA TGC     |
| EP300-E8-R    | ATG ATG GTG GGA AAG GTT GAG     |

(Continued)

| Primers names | Primers sequences                       |
|---------------|-----------------------------------------|
| EP300-E25-F   | CAG GCA TGA AAG CAA GGT ATC             |
| EP300-E25-R   | TTG CAT TTC CAA ACC AAA CAC             |
| EP300-E27-F   | GGT ATC TAT ATC AAC TCC AAC TTG TGG     |
| EP300-E27-R   | GAA TGG CAT GAA CCC AGG                 |
| EP300-E30-F   | CCA TGG TGG GAT AAT TGC TTG             |
| EP300-E30-R   | AAA TAC GTG GCT GCA TGG C               |
| EP300-E31-F   | ATG CCT TCA CAA TTC CGA GAC             |
| EP300-E31-R   | AAA GCA TTG AAT TCT GGT CCG             |
| EZH2-E6-F     | TTT AGT GCC AGT TAC TAG GCT ATG C       |
| EZH2-E6-R     | CAA GCA ATC TGC CCA CCT TAG             |
| EZH2-E8-F     | TCG ATG AAT TTG ATT CTT GAT AAC AC      |
| EZH2-E8-R     | TTC TAG TTG TAA TAA ATG ATA GCA CTC TCC |
| EZH2-E9-F     | GGA GGA GGA ATG GAG AAT ACG             |
| EZH2-E9-R     | CAT AAC AGC ATG GGT GCA GAC             |
| EZH2-E10-F    | ATT ATT TGT GAT AAA TGG ATA ATG TGA     |
| EZH2-E10-R    | GCA GGA AAC AGA AAC AAC ACA             |
| EZH2-E20-F    | CAG CAG GCT TTG TTG TGT TAA G           |
| EZH2-E20-R    | TTC AAC AAG GAC AAG TTC AAG TAT TC      |
| FAT4-E1-1-F   | CCG CGC CAG GTG TTC CAA GT              |
| FAT4-E1-1-R   | CGT CCT GCA GGC GAT AGC GG              |
| FAT4-E1-2-F   | CGC CAC CGA CTC GGA CAT CG              |
| FAT4-E1-2-R   | CGG TGA GCA GAG CCA CCA CG              |
| FAT4-E1-3-F   | GGC GCC TCC GGG AAG CTA TG              |
| FAT4-E1-3-R   | GAC TGG GGA GGG GAG CCC AG              |
| FAT4-E1-4-F   | TGC TGG GGA CAG GTC TCG GT              |
| FAT4-E1-4-R   | TCC AGG GGC CCA AGC AGA CT              |
| FAT4-E1-5-F   | AGG TAG TGG CCA GTG GGG GC              |
| FAT4-E1-5-R   | TGC CCA CAA ACG ACC CAG CC              |
| FAT4-E1-6-F   | GGC GGA GAG GGA CTG CTG TG              |
| FAT4-E1-6-R   | TGC ATC AGG GTC ATG TGC AGT CA          |
| FAT4-E3-F     | AAA GCC TTC CTT TGT CAA ATA CA          |
| FAT4-E3-R     | TCA TTG ATT AAG AGC AGC CGA             |
| FAT4-E8-F     | TTT CTT GCA TTT CTA CCT CAG TTT         |
| FAT4-E8-R     | CAC AAT TAG TCT AGC AAG AAA GGG         |
| FAT4-E9-1-F   | AAT GGA CAA GGA CAG TGG ACC             |
| FAT4-E9-1-R   | CAG TCC ACC CAG AAT CAT GTG             |
| FAT4-E9-2-F   | TTC CTA TTA TTT AGA TTG CCC TGA AC      |

(Continued)

| Primers names   | Primers sequences                 |
|-----------------|-----------------------------------|
| FAT4-E9-2-R     | AAC TCT GAT TAA CTT CGT ACC AAC C |
| FAT4-E9-3-F     | GGG TGG ATT TCA GTA GCA TCC       |
| FAT4-E9-3-R     | ACG CAA TCA CAG CAT TTG TTC       |
| FAT4-E9-4-F     | TGG AAC AAA TGC TGT GAT TGC       |
| FAT4-E9-4-R     | CTT CTT ATT GAT CTG GAA ACC CTT C |
| FAT4-E9-5-F     | ATG GTA ACT TGT TTC CCG GTG       |
| FAT4-E9-5-R     | CGT AGA CAG CTC CCT CCA TTC       |
| FAT4-E15-F      | TGC ATT TAA ACA TGT GAA ATC AAC T |
| FAT4-E15-R      | CCC AGC ATT AGT CGG AAC TCT       |
| FAT4-E17-1-F    | CCT CAG TGA AGA TTG GCT GC        |
| FAT4-E17-1-R    | TCC TCA CAG TCA TGT CAT CCC       |
| FAT4-E17-2-F    | GGT CCT TAG CCT GAT CCT GTG       |
| FAT4-E17-2-R    | GAG ACA GAG GGT TGG GAG TTG       |
| FAT4-E17-3-F    | TCC ACT GGA ATC TTC TCC TCC       |
| FAT4-E17-3-R    | TTT AGT TGT CCC AGC TTT GCC       |
| FAT4-E17-4-F    | CTG AAG CCT CGA AGG TAC CAC       |
| FAT4-E17-4-R    | AAA TGC TGC ATG CCA CAT AAC       |
| IRF4-E2-F       | GCT TCG CAG CCT CAA AGA CTC       |
| IRF4-E2-R       | TCC TCC TCG CGG TTG TAG T         |
| IRF4-E3-F       | TGAGCTATCATCGTGCCACTG             |
| IRF4-E3-R       | ATA ACT CAG GCA AGG AGG CTG       |
| IRF8-E2-F       | TGCAAACCTCTGAGTTTCCTG             |
| IRF8-E2-R       | TCA GCA CTC CTG AAC CAA TG        |
| IRF8-E3-F       | AAG ATT CAT GGG AAG GGA AGG       |
| IRF8-E3-R       | GAC CCA AGT TCT GTG GTG AAG       |
| IRF8-E4-F       | AAT TCT GTG CCT TTC CCA AAC       |
| IRF8-E4-R       | GGC TGC CTT CAT ACA GCA AG        |
| IRF8-E7-F       | TCT TGT CAC AGC ATT CTC CC        |
| IRF8-E7-R       | AAC TGG CTG GTG TCG AAG AC        |
| MEF2B-E2-F      | AAA GGC TGA CAT GGC ATC AG        |
| MEF2B-E2-R      | GAC AGA GGA GAG GTG TGA GGC       |
| MEF2B-E3-F      | TAA AGC ACG TCA GCC ACA AAG       |
| MEF2B-E3-R      | GCA TGT TCG AGG AAG GGT TAG       |
| MLL2-49415846-F | AGG GGA GGC CAG AGA AGA TA        |
| MLL2-49415846-R | ATG ACG AGG AAG GAG GGA TT        |
| MLL2-49418430-F | CAT CAC AAG CTC ACC GTT TG        |
| MLL2-49418430-R | TGT GGA ATC GCA TCA TTG AG        |

(Continued)

| Primers names   | Primers sequences             |
|-----------------|-------------------------------|
| MLL2-49420076-F | AAC AGT GAC CCT GGG AGA AA    |
| MLL2-49420076-R | GAA GCA AAT CGC TAG CAT CA    |
| MLL2-49420213-F | GCC CGT TGT TCT CAC CAA TA    |
| MLL2-49420213-R | TGC CCC AAT GTC TAC CAT TT    |
| MLL2-49420597-F | ATG GTA GAC ATT GGG GCA AC    |
| MLL2-49420597-R | GAA AGG AGT GCG CTG GAA G     |
| MLL2-49420623-F | AGG GAG CAC TTG GTT AGC AG    |
| MLL2-49420623-R | AAGGTGAAGATTCCCGTCCT          |
| MLL2-49420890-F | CCA CTG CCC TTC TGG ATG       |
| MLL2-49420890-R | TAC AGG GCA CCC TCC TAC A     |
| MLL2-49420960-F | CGC ACT CCT TTC CAT TTC TT    |
| MLL2-49420960-R | TGA GGA GCT GGC ACT AAT GA    |
| MLL2-49421680-F | TCC CAA AGC ACT GGG ATT AC    |
| MLL2-49421680-R | TAT GAG GTG CTG TTC CCA GA    |
| MLL2-49421830-F | CAA ACT GCT TCA GCC AAT CA    |
| MLL2-49421830-R | GGG GAG TGG GTT CTA GGT GT    |
| MLL2-49422918-F | GTA ACA CTT GGC CGC CTC T     |
| MLL2-49422918-R | GGG GTA CAG GTT GCC TCA TA    |
| MLL2-49425021-F | ACC CAG GCT CAC TCA TTC TG    |
| MLL2-49425021-R | GGA GCC CAG TCA GTG AAG A     |
| MLL2-49425220-F | TTC CTG GTG CCC CTA TTG G     |
| MLL2-49425220-R | AGC CCT CAA GAG CCA AAG AG    |
| MLL2-49425625-F | TGG ATG GGT GGG AGG GAG       |
| MLL2-49425625-R | GCA CTT AAG TCC TCA GCA GC    |
| MLL2-49425673-F | CTC TTT GGC TCT TGA GGG CT    |
| MLL2-49425673-R | TGG GGT TGG AAT CAT GCC TA    |
| MLL2-49425853-F | CAA GTT GAG GTT GGC AGC C     |
| MLL2-49425853-R | ATC AGC CTG GGT CCA TGA C     |
| MLL2-49426159-F | TGT GGC CCT GTA TTA TTT TGC A |
| MLL2-49426159-R | CTC TAC ACA TCA GGG AGG GC    |
| MLL2-49426471-F | TTT TGT TCC TTG CCC GTC AG    |
| MLL2-49426471-R | AACAACAGCACCAACAGCAA          |
| MLL2-49427057-F | CTT GCT GTT GGT GCT GTT GT    |
| MLL2-49427057-R | TCT AGG ACA GGT GGC AAT CC    |
| MLL2-49427364-F | CTG TTG CTG CTG GAT TGC C     |
| MLL2-49427364-R | CTC ACC AAG CTC CCT GGT C     |
| MLL2-49428035-F | TCT TGC TCT GCT GCT CTG TA    |

(Continued)

| Primers names   | Primers sequences             |
|-----------------|-------------------------------|
| MLL2-49428035-R | GAG TGC TGG TGA TCC CTC C     |
| MLL2-49428427-F | GAG GGA TCA CCA GCA CTC C     |
| MLL2-49428427-R | AGG TAA GAC TCA GGG CTG GA    |
| MLL2-49430941-F | AGC CAA AGT TCT TTG TGT CCC   |
| MLL2-49430941-R | CCA CTG ATG CCC ACC CAG       |
| MLL2-49431115-F | CAT TGC CAA TTG CTG CG        |
| MLL2-49431115-R | TGT CTT TGC CAC ATG AGG G     |
| MLL2-49431358-F | CCT GGC TGT CGG GCA CCT       |
| MLL2-49431358-R | CCT GGT GGA CCT GCA GCA TC    |
| MLL2-49431709-F | TCA TGC TCT GTC CTG GCT TT    |
| MLL2-49431709-R | GAG AAG GCT GAA CGG GAG G     |
| MLL2-49431742-F | AGG CCT TCT CAG CTG TGT G     |
| MLL2-49431742-R | CTT CAA TGA GCA CCT GAG GC    |
| MLL2-49431925-F | AAT TGG CAA GGA GAA GGG TG    |
| MLL2-49431925-R | TGA AGA GCT TGC TCA CCT GG    |
| MLL2-49432721-F | ACG CCT TCC TCT ATG GAT GTG   |
| MLL2-49432721-R | TTC TGT ACA TTG TGC CGC AG    |
| MLL2-49433749-F | GTTT CAC TTT CCC TCA GGC AG   |
| MLL2-49433749-R | ATC AGC AGC TCT CGT AGT CGC   |
| MLL2-49434438-F | GAG CTG GAC TGG GAC TGA G     |
| MLL2-49434438-R | CTG GGC TTT GTT GAC TCA CC    |
| MLL2-49434910-F | AGC TCT TCC TTC TTC ACC TCT   |
| MLL2-49434910-R | TCT TCC TCA AGC TCC CAC C     |
| MLL2-49435230-F | TAA GGC TGT GTC CCA TAT CCC   |
| MLL2-49435230-R | GGA GCT TGA GGA AGA GCT CAC   |
| MLL2-49436557-F | GGA GGA GGT CCT ATC TTT GGG   |
| MLL2-49436557-R | CCT ACA AGA CGG ACA GGA TCA G |
| MLL2-49438195-F | TCT CAG TGG CAG GAT GAC AAG   |
| MLL2-49438195-R | ACC ACC AAT GCC TAT GAG GAG   |
| MLL2-49438548-F | TGT CAT CCT GCC ACT GAG AG    |
| MLL2-49438548-R | ATG CAG AGC CCC AGT ACT TT    |
| MLL2-49439859-F | ACC TGG CTC TTT CAC CTT CA    |
| MLL2-49439859-R | TGA ACG GTG AGA ACA TCC CT    |
| MLL2-49440431-F | GGT TGA AAC TTG CAG TTC TGG   |
| MLL2-49440431-R | AAC TGA GTG GCA ATG TAG CCC   |
| MLL2-49440432-F | CAC TTG TAC CTG AGA GGC AGA G |
| MLL2-49440432-R | CCC AGC CTC TGT CAC ATA CTC   |

(Continued)

| Primers names   | Primers sequences               |
|-----------------|---------------------------------|
| MLL2-49443789-F | ATC CGT AGA GAC CCC CAA CT      |
| MLL2-49443789-R | CTC TGG ATG GGA TTG ATG CT      |
| MLL2-49444297-F | GTG CAG CTC AGC CTC ATC T       |
| MLL2-49444297-R | TCT CAC CCA TCA TCA CAG CT      |
| MLL2-49444408-F | CTG GGA AGG AGG GGA GTT TT      |
| MLL2-49444408-R | CAG CTG TAA CTC TTC ATG GCA     |
| MLL2-49444855-F | GGA CAA CGG CAG CTC CTC         |
| MLL2-49444855-R | CTG AGG GAC CAC ATC TGT CC      |
| MLL2-49445257-F | GCA TCA CGC CTG TCC CCA CC      |
| MLL2-49445257-R | GTG GCT CCT CAG GCA CAG CG      |
| MLL2-49445610-F | CAC TTG AGA CGC CTC TAT CCC     |
| MLL2-49445610-R | CTC AGG TAG TGG CAA CAG GG      |
| MLL2-49446078-F | GGA GAC AAG GGC GAC TCC         |
| MLL2-49446078-R | GGC AAG AGA CAG TTT GTG CA      |
| MLL2-49446703-F | CAA ATC CTA GAG AGC ACA CTG G   |
| MLL2-49446703-R | TTT GCT GTC TGA CCA ATG CC      |
| MLL2-49447867-F | AAA ATC CAA GGC ACA TTT GG      |
| MLL2-49447867-R | GGC TGG TGG GCT TCT GAG         |
| MYOM2-E2-F      | TCT GCA TAT ACC AGT GGT TTG G   |
| MYOM2-E2-R      | AGC TAA GGT CGC TCT TCC CTC     |
| MYD88-E3-F      | GTA TCA TCT TGG GAA GGG TGC     |
| MYD88-E3-R      | AGC TAG GAG GAG ATG CCC AG      |
| MYD88-E4-F      | CTG GCA CCT GTG TCT GGT CTA     |
| MYD88-E4-R      | TTG GTA CTG CAT CCA CAG TCC     |
| MYD88-E5-F      | GAT GGC TGT TGT TAA CCC TGG     |
| MYD88-E5-R      | TCC TAC AACGAAAGGAGGAGG         |
| MYOM2-E14-F     | GCG AGA ACA GAG CAT TTC TTC     |
| MYOM2-E14-R     | CAC ACA ATT TAA GGC TAT TTG GTG |
| MYOM2-E17-F     | GTT GCT TCC TCC TCC CTC TG      |
| MYOM2-E17-R     | CAT CAA ACG CAG AAA CAT TGC     |
| MYOM2-E19-F     | AAC AGA TAC GGA TGG TCC TGG     |
| MYOM2-E19-R     | GTG ATT GGC CCG CCT TTA C       |
| MYOM2-E21-F     | GTC CCT AAG CCG CTC ACT TC      |
| MYOM2-E21-R     | AAA CAG GCA AGG TTC TGC CA      |
| MYOM2-E28-F     | TTG ACG TTA TTG GGA GCG AC      |
| MYOM2-E28-R     | ATT CAC CGT GGT CCT TCT TTG     |
| MYOM2-E31-F     | GTG AGA ACA GGA TTG CAG GTG     |

(Continued)



| Primers names | Primers sequences             |
|---------------|-------------------------------|
| MYOM2-E31-R   | GAA ATG GCA GTG CCT TGA TG    |
| MYOM2-E32-F   | GTC ACA GCA ACG GGA CAT TG    |
| MYOM2-E32-R   | TGC TGG AAT TCT GCA AAT GCT T |
| PDL1-E2-F     | CCG GTG TTA CAT CTG CAA GG    |
| PDL1-E2-R     | CAG AGC AGG CTG AAT TGT TTC   |
| PDL2-E2-F     | CTC ATA GAT GGC CAG AAA CGG   |
| PDL2-E2-R     | GGG AAG AGG AGG ATC TGG AAG   |
| PIM1-E1-1-F   | CCC GAG GGA GTC GGT GGC A     |
| PIM1-E1-1-R   | CTT GGT GGC GTG CAG GTC GT    |
| PIM1-E1-2-F   | GCA TAG CCT TCG GCA CAG       |
| PIM1-E1-2-R   | CCT AGG AAA GGG GGA AGC AC    |
| PIM1-E2-F     | CAC TGA GTC CCC GTG CTT       |
| PIM1-E2-R     | TCA CCC CAC CCA CTCATC        |
| PIM1-E3+4-F   | GTG CTT TAG CCC GGA CGA GG    |
| PIM1-E3+4-R   | GAC GGT GTC CTT GAG CAG CG    |
| PIM1-E4-F     | CAG CTT CTT CTG GCA GGT G     |
| PIM1-E4-R     | AAA TCC CCG GCT TTA CTA CG    |
| PIM1-E5-F     | ACC CAG CTT CTT TGT GCT TG    |
| PIM1-E5-R     | GGA GAG TGA AGC TCT CCA GAA   |
| PKD1-E11-F    | CTC TCC ACA GGT CAC CCT CC    |
| PKD1-E11-R    | AAC AGG GTA TCG TTG GTC TCC   |
| PKD1-E15-1-F  | CTG CCA ACC ACA CCT ATG C     |
| PKD1-E15-1-R  | ACC TCC AGG ACG AAG ACC AG    |
| PKD1-E15-2-F  | CTA CAC CTG GGA CTT TGG CAC   |
| PKD1-E15-2-R  | AGC GGA AGG TGT AAG AGA TGG   |
| PKD1-E15-3-F  | ACC ATC TCT TAC ACC TTC CGC   |
| PKD1-E15-3-R  | GCT ATG GGT GGT AAA TGG CTC   |
| PKD1-E15-4-F  | GAG CCA TTT ACC ACC CAT AGC   |
| PKD1-E15-4-R  | GTG AGG TTG TAC GTG GCT GAG   |
| PKD1-E15-5-F  | CTG AGA GGA ACT TCA CAG CCC   |
| PKD1-E15-5-R  | CAG TCT GGT AGG TGA CGC AG    |
| PKD1-E16-F    | ATG AGC CCA GAG AAC ACC C     |
| PKD1-E16-R    | GAC TGT ACG TGG AAC TGT GGC   |
| PKD1-E23-F    | GGA GCC GAG TCA CCA TCT C     |
| PKD1-E23-R    | TCC AGC AGC GTA TAG TTG AGC   |
| PKD1-E25-F    | GTA TGG GCT CTG AGA CTG CG    |
| PKD1-E25-R    | AGG ATA GAG CCG AGC CCA C     |

(Continued)

| Primers names  | Primers sequences               |
|----------------|---------------------------------|
| PKD1-E45-F     | CTT GGG CCT GGT GGT GCT CG      |
| PKD1-E45-R     | ACT GGG CCG TAC CCA CCT CC      |
| PKD1-E46-F     | CAG GCT GCG CCT CTG GAT GG      |
| PKD1-E46-R     | GCC AGT GGC CAG GTC CAC AC      |
| PRDM1-E2-F     | TCA GAA GGA GCC ACA GGA AC      |
| PRDM1-E2-R     | AAG GCC TCA AGG GCA AGT AG      |
| PRDM1-E3-F     | TTT AAT GCT TGG TTG AGT ATT TGC |
| PRDM1-E3-R     | AAA GGT GAG CCA CCC AGC         |
| PRDM1-E5-1-F   | GTG TCG CCA GCT GTT ACT CAG     |
| PRDM1-E5-1-R   | CGT AGG ACG CGT TCA AGT AAG     |
| PRDM1-E5-2-F   | CCC AAA GAG AGA GTA CAG CGT G   |
| PRDM1-E5-2-R   | AGT TGT TGA TGC CAT TCA TGC     |
| PRDM1-E5-3-F   | TAC TTG AAC GCG TCC TAC GG      |
| PRDM1-E5-3-R   | ATC TTG CCG TTC TGC TTC TTC     |
| PRDM1-E7-F     | CAC AAG GAG GCT TCT CAC CTC     |
| PRDM1-E7-R     | TTT GCA AAG ACA CTT TCA GGC     |
| TNFAIP3-E2-F   | CTG CAG GCA GCT ATA GAG GAG     |
| TNFAIP3-E2-R   | GAT TTG AGT TTG GGC TTG TCC     |
| TNFAIP3-E3-F   | CTC AGT ACA TGT GGG GCG TT      |
| TNFAIP3-E3-R   | GGG GGA AAA ACC TAC CCG AG      |
| TNFAIP3-E4-F   | CTC GGG TAG GTT TTT CCC CC      |
| TNFAIP3-E4-R   | GAG CCA AGG CAT AAG GCT GA      |
| TNFAIP3-E6-F   | TGG AGC AAG TAA ACG CCT GT      |
| TNFAIP3-E6-R   | AAA CTG GCC GCA AAT CAC TC      |
| TNFAIP3-E7-1-F | TGT GTC AGA TCA TGT TGC GTG     |
| TNFAIP3-E7-1-R | CAA GGG CTC ATA GGC TTC TCC     |
| TNFAIP3-E7-2-F | GTT CAG TGA GAC CAC TGCCA       |
| TNFAIP3-E7-2-R | GCT CTG TCT ACA GGG CAC TC      |
| TNFAIP3-E9-F   | TGA GAT TTC ATT GTG CTC TCC C   |
| TNFAIP3-E9-R   | CTCAGA CAC CCT TAA GCC CAC      |
| TNFSF9-E3-R    | GTA GAG AAA GCA GCA GGG ACC     |
| TNFSF9-E4-F    | CTA AGT GCA TGC TTT CCT CCC     |
| TP53-1-F       | TAA GCAGCA GGA GAA AGC CC       |
| TP53-1-R       | TCC TAC AGT ACT CCC CTG CC      |
| TP53-2-F       | AGG AGA GAT GCT GAG GGT GT      |
| TP53-2-R       | GAG ACC TGT GGG AAG CGAAA       |
| TP53-3-F       | GCC ACA GGT CTC CCC AAG GC      |

(Continued)

| Primers names | Primers sequences          |
|---------------|----------------------------|
| TP53-3-R      | TGG GGC ACA GCA GGC CAG TG |
| TP53-4-F      | TTG GGA GTA GAT GGA GCC T  |
| TP53-4-R      | AGT GTT AGA CTG GAA ACT TT |

### Fluorescence *in situ* hybridization (FISH) analysis

*MYC* translocation and amplification were investigated by FISH analysis on FFPE sections of 196 cases using the Vysis LSI *MYC* Dual Color Break Apart Rearrangement probe and Vysis IGH/*MYC*/CEP 8 Tri-Color DF FISH Probe Kit (Vysis), as described previously [1]. Amplification of *MYC* was defined by the presence of more than two orange signals of *MYC* along with two aqua signals of centromere 8. Samples were analyzed on a fluorescence microscope and images were captured with the Isis software (META systems). At least 200 intact, non-overlapping nuclei were scored for each case, and the normal cut-off value was 10% of suspected tumor cells.

### Gene copy number variation analysis based on NGS data

A total of 203 samples have been included for copy number variation (CNV) analysis based on NGS data, which included 196 DLBCL samples and 6 reactive lymph nodes. One DLBCL sample was used in duplicate for the purpose of quality control of the analysis. Candidate genes with genomic gain or loss were detected based on the read-depth information of the NGS data [2-5]. First, we aligned Ion amplicon sequencing reads to hg19 using the BWA-MEM algorithm and calculated the average depth for each target region across 203 samples [6]. Second, the target regions were removed due to abnormal read-depth if larger than the 99% quantile or smaller than the 1% quantile, read-depth below  $20 \times$  in either of DLBCL samples and reactive lymph nodes or read-depth ratio greater than 4. The read-depth ( $d_i^j$ ) of gene  $j$  of sample  $i$  as well as the read-depth of sample  $i$  ( $D_i$ ) were then calculated based on the mean depth of those retained target regions. Third, the read-depth ratio ( $R_i^j$ ) of gene  $j$  of sample  $i$  was calculated according to one of the formulas listed below. If the distribution pattern of  $d_i^j$  was significantly different from that of  $D_i$  in 203 samples,  $d_i^j$  was then deemed to indicate over- or under-sampling in the Ion amplicon sequencing experiment. Accordingly, the read-depth ratio ( $R_i^j$ ) would be calculated with the correction coefficient  $r$  as follows:

$$R_i^j = \frac{d_i^j}{D_i} \times r, r = \frac{\bar{D}}{\bar{d}^j} \quad (1)$$

where  $d_i^j$  is the average read-depth of gene  $j$  in sample  $i$ ,  $D_i$  is the average read-depth of sample  $i$ ,  $\bar{D}$  is the mean value of  $D_i$ ,  $\bar{d}^j$  is the mean value of  $d_i^j$  in 203 samples and  $r$  is the correction factor. If the distribution pattern of  $d_i^j$  was not significantly different with that of  $D_i$  in 203 samples, the read-depth ratio ( $R_i^j$ ) would be calculated without correction, as follows:

$$R_i^j = \frac{d_i^j}{D_i} \quad (2)$$

Finally, we generated the normal distribution of the read-depth ratio for individual gene with their mean and standard deviation based on  $R_i^j$  values ranging from 0.8 to 1.2. To detect the potential gene copy number loss or gain in an individual sample, a  $P$  value was calculated by comparing  $R_i^j$  with the generated normal distribution of the read-depth ratio. The  $Q$ -value was corrected from the  $P$ -value with FDR. Loss of gene copy number in a sample was defined as the mean depth ratio of a sample lower than the normalized mean depth ratio with  $Q$ -value  $\leq 1e^{-2}$ . If the mean depth ratio of a sample was higher than the normalized mean depth ratio with  $Q$ -value  $\leq 1e^{-5}$ , a gain of copy number of a given gene was considered. All identified loss of gene copy number had been ruled out when the sample contained detectable heterozygous single nucleotide variations with mutant allele frequency between 0.4 and 0.6. CNV frequencies of all 27 genes were further verified in the COSMIC cancer database (<http://cancer.sanger.ac.uk/cosmic>).

### Immunohistochemistry

Paraffin embedded tissues sections were dewaxed in xylene and subjected to immunohistochemical staining analysis as described elsewhere. Anti-p105/p50 (NF- $\kappa$ B1), anti-p100/p52 (NF- $\kappa$ B2), anti-phospho-p38 MAPK (Thr180/Tyr182) rabbit monoclonal antibody (Cell signaling Technology), anti-TP53 rabbit polyclonal antibody (Proteintech), anti-CD58/LFA-3 goat polyclonal

antibody (R&D Systems) and biotinylated secondary antibody were used in the present study. Thermo Scientific™ UltraVision Quanto Detection System HRP DAB and Polink-1 HRP Goat DAB Detection System were used to detect immune reactivity. In order to define elevated TP53 protein expression, a cut-off was set at 50% positive staining cells as proposed by Xu-Monette et al [11]. For NF- $\kappa$ B and P38-MAPK activity, cases were considered to be positive when  $\geq 30\%$  of tumor cells showed nuclear NF- $\kappa$ B localization. Each slide was evaluated independently by two pathologists who were blinded to clinical and outcome data.

## REFERENCES

1. Hans CP, Weisenburger DD, Greiner TC, Gascoyne RD, Delabie J, Ott G, Müller-Hermelink HK, Campo E, Braziel RM, Jaffe ES, Pan Z, Farinha P, Smith LM, *et al.* Confirmation of the molecular classification of diffuse large B-cell lymphoma by immunohistochemistry using a tissue microarray. *Blood*. 2004;103: 275-282.
2. Xie C, Tammi MT. CNV-seq, a new method to detect copy number variation using high-throughput sequencing. *BMC Bioinformatics*. 2009;10:80.
3. Plagnol V, Curtis J, Epstein M, Mok KY, Stebbings E, Grigoriadou S, Wood NW, Hambleton S, Burns SO, Thrasher AJ, Kumararatne D, Doffinger R, Nejentsev S. A robust model for read count data in exome sequencing experiments and implications for copy number variant calling. *Bioinformatics*. 2012; 28: 2747-2754.
4. Koboldt DC, Zhang Q, Larson DE, Shen D, McLellan MD, Lin L, Miller CA, Mardis ER, Ding L, Wilson RK. VarScan 2: somatic mutation and copy number alteration discovery in cancer by exome sequencing. *Genome Res*. 2012; 22:568-576.
5. Sathirapongsasuti JF1, Lee H, Horst BA, Brunner G, Cochran AJ, Binder S, *et al.* Exome sequencing-based copy-number variation and loss of heterozygosity detection: ExomeCNV. *Bioinformatics*. 2011; 27: 2648-54.
6. Li H. Aligning sequence reads, clone sequences and assembly contigs with BWA-MEM. *arXiv preprint arXiv:1303.3997*, 2013.

SUPPLEMENTARY FIGURES AND TABLE

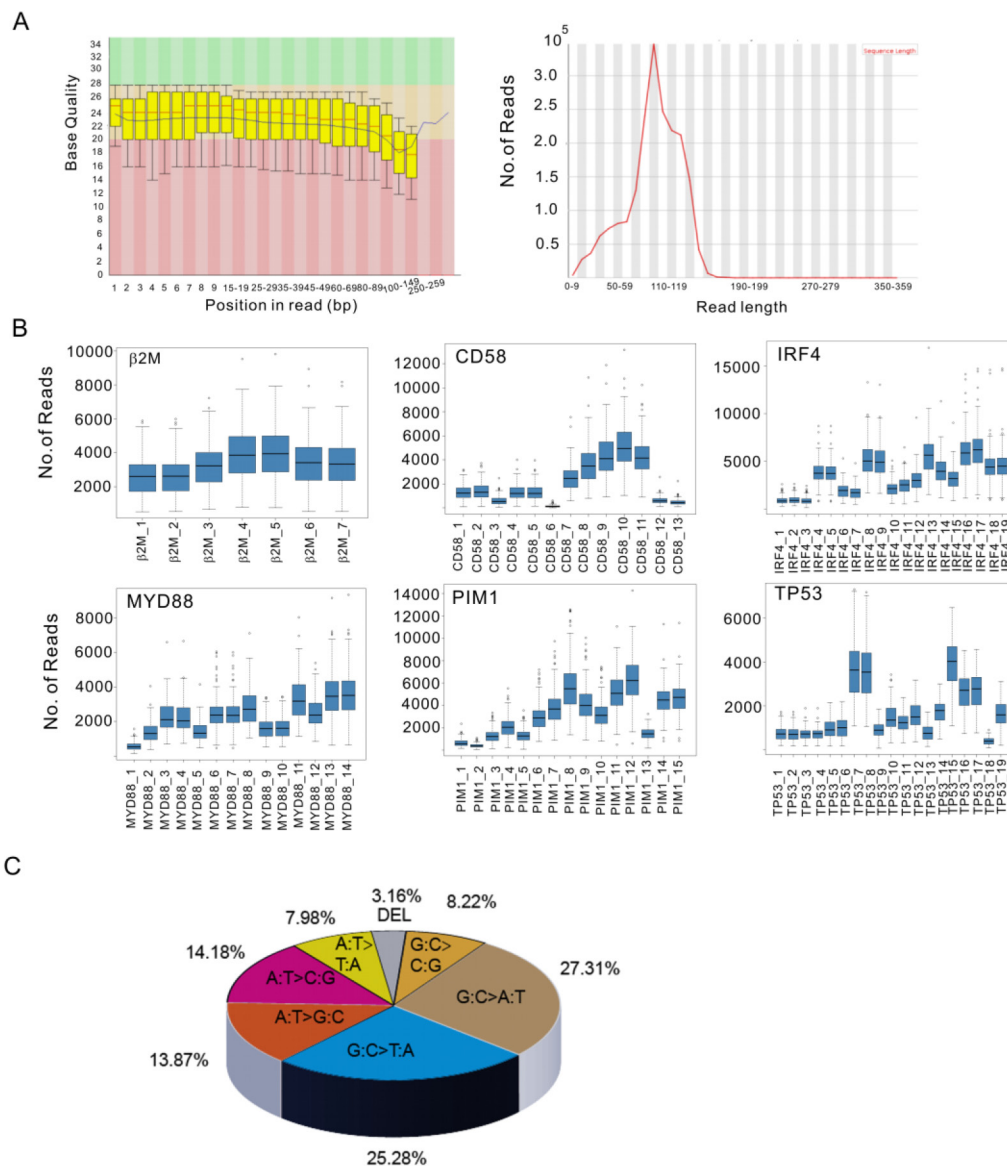

**Supplementary Figure S1: Next generation sequencing data output. A.** Distribution of generated amplicon sequence reads per patient. For an exemplary patient, the read length (x-axis) and number of generated sequence reads (y-axis) is represented. **B.** Coverage of generated sequence reads and distribution of generated sequence reads per amplicon. For each of the 27 amplicons (x-axis), the range of generated sequence reads is represented by box-and-whisker plots (y-axis). **C.** Proportion of base alterations in DLBCL genome. Diagram depicts the proportion of DLBCL somatic mutations in each mutational class of transitions and transversions.

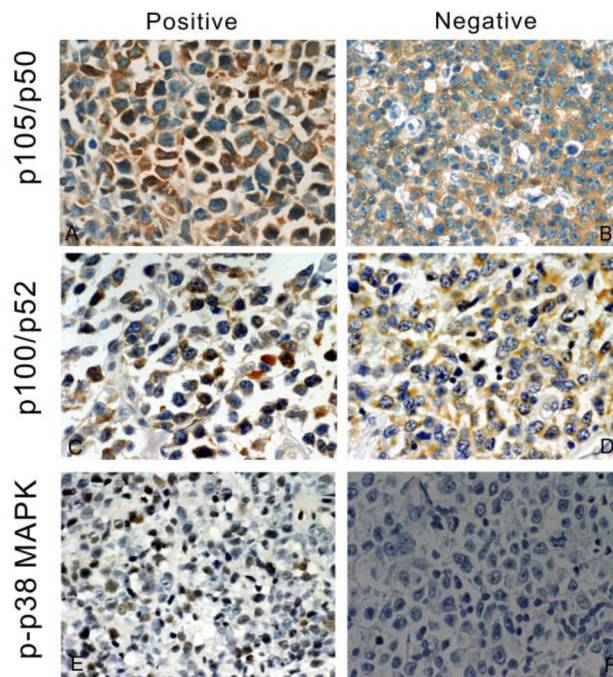

**Supplementary Figure S2: The NF- $\kappa$ B pathway and p-38 MAPK pathway are activated in primary DLBCL of the CNS or testis with *MYD88* mutations.** Immunohistochemical staining of primary DLBCL of the CNS or testis biopsy with anti-NF- $\kappa$ B1 (p105/p50, A-B), anti- NF- $\kappa$ B2 (p100/p52, C-D) and anti- p-38 MAPK (E-F) antibodies. Nuclear location of NF- $\kappa$ B denotes active signaling, as opposed to the inactive, cytoplasmic complex. Original magnification,  $\times 200$ .

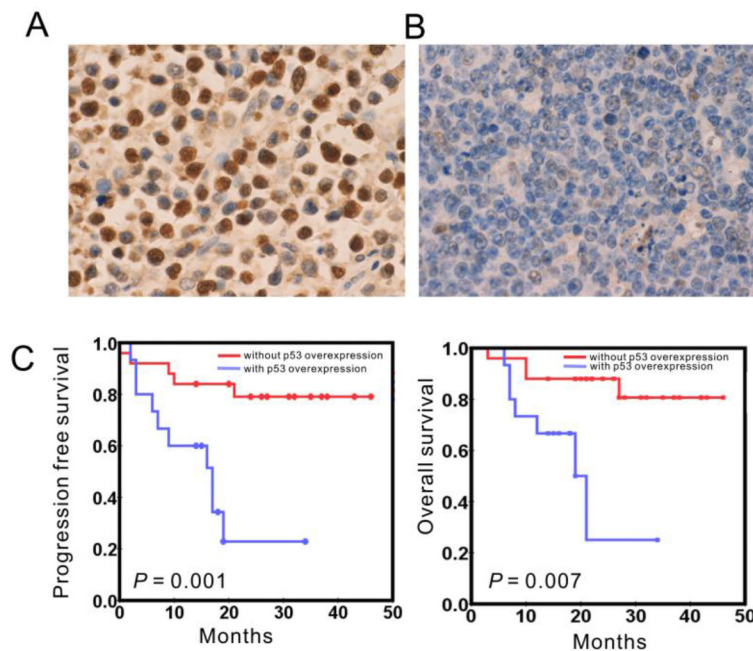

**Supplementary Figure S3: p53 overexpression was associated with mutational status and predicted worse PFS and OS.** A total 40 DLBCL cases were included to detect p53 expression using immunohistochemical staining, of which, 17 cases with *TP53* mutations and 23 cases without. **A.** Elevated p53 expression was observed in a reprehensive case with *TP53* mutation, original magnification,  $\times 200$ . **B.** A reprehensive case without *TP53* mutation showed no elevated immunoreactivity for p53, original magnification,  $\times 200$ . **C.** p53 overexpression predicted shorter PFS and OS.

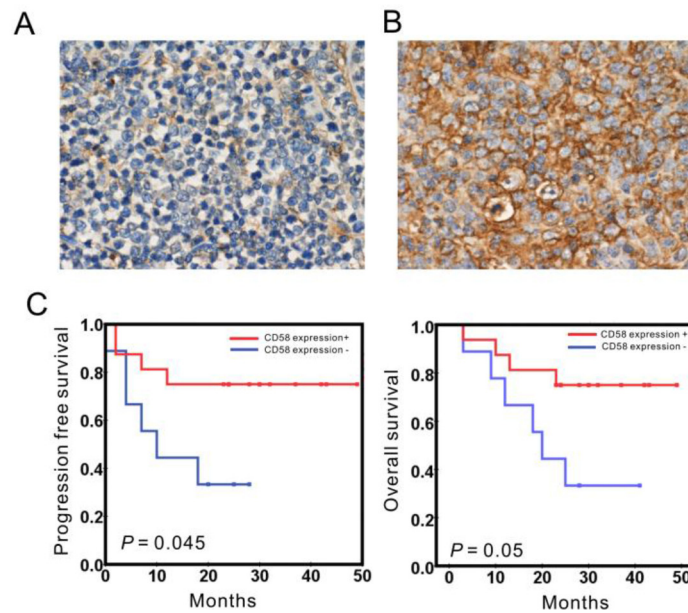

**Supplementary Figure S4: *CD58* mutated DLBCL cases lack *CD58* cell surface expression and have inferior PFS and OS.** *CD58* protein expression was detected in 10 cases with *CD58* mutation and 15 wild-type cases. **A.** A representative *CD58* mutated case showed defective *CD58* surface expression, original magnification, × 200. **B.** *CD58* surface expression in a representative *CD58* WT case, original magnification, × 200. **C.** *CD58* mutated DLBCL cases had inferior PFS and OS.

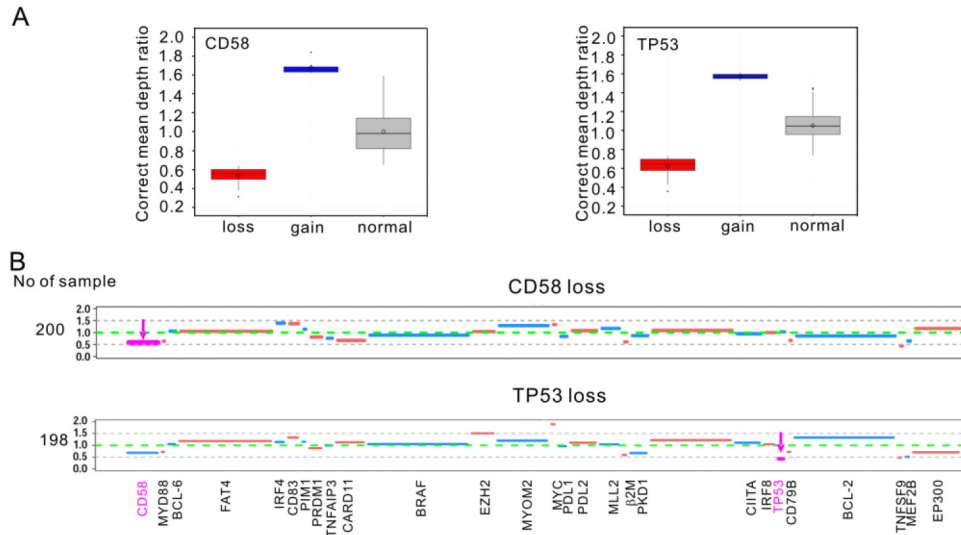

**Supplementary Figure S5: Detection of gene copy number losses in DLBCL samples based on next generation sequencing data.** A total 203 samples have been included for copy number variation (CNV) analysis based on NGS data, of which included 196 DLBCL samples and 6 reactive lymph nodes. One DLBCL sample was set as duplicate for the purpose of quality control for the analysis. Candidate genes with genomic gain or loss were detected based on read-depth information of NGS data. **A.** The distribution of depth ratio in different sample groups with loss, gain or normal gene copy number. The mean depth ratio of 203 samples (horizontal line) is set as 1.0 with standard deviation ranging from 0.8 to 1.2. The Loss of gene copy number in a sample is defined when the mean depth ratio of a sample is lower than the normalized mean depth ratio with  $Q$ -value  $\leq 1e-2$ . If the mean depth ratio of a sample is higher than the normalized mean depth ratio with  $Q$ -value  $\leq 1e-5$  was considered as gain of a given gene. Colored box represents the mean depth ratio of samples with loss (red), gain (blue) or normal gene copy number (grey) with standard deviation. **B.** Representative results showing losses of *CD58* or *TP53* copy number detected based on the mean depth ratio (purple lines and arrows). The corrected mean depth ratio calculated from whole samples (green dotted line) is set as 1.0 with standard deviation ranging from 0.8 to 1.2. The depth ratio of the sample analyzed is shown on the left.

Supplementary Table S1: Frequencies of 27 gene mutations in patients with DLBCL

| Genes          | Mutated cases | Frequency (%) |
|----------------|---------------|---------------|
| <i>PIMI</i>    | 53            | 27.04         |
| <i>MLL2</i>    | 38            | 18.59         |
| <i>FAT4</i>    | 34            | 15.90         |
| <i>TP53</i>    | 29            | 14.80         |
| <i>CD79B</i>   | 29            | 14.80         |
| <i>MYD88</i>   | 27            | 13.78         |
| <i>PKD1</i>    | 19            | 9.69          |
| <i>CARD11</i>  | 17            | 8.64          |
| <i>β2M</i>     | 16            | 8.16          |
| <i>TNFAIP3</i> | 14            | 7.14          |
| <i>CIITA</i>   | 14            | 7.14          |
| <i>IRF4</i>    | 12            | 6.12          |
| <i>MYC</i>     | 11            | 5.61          |
| <i>BCL-6</i>   | 11            | 5.61          |
| <i>EP300</i>   | 10            | 5.10          |
| <i>CD58</i>    | 10            | 5.10          |
| <i>CD83</i>    | 9             | 4.59          |
| <i>BRAF</i>    | 9             | 4.59          |
| <i>PRDM1</i>   | 8             | 4.08          |
| <i>IRF8</i>    | 8             | 4.08          |
| <i>BCL-2</i>   | 8             | 4.08          |
| <i>MYOM2</i>   | 7             | 3.57          |
| <i>MEF2B</i>   | 6             | 3.06          |
| <i>EZH2</i>    | 6             | 3.06          |
| <i>PDL2</i>    | 2             | 1.02          |
| <i>PDL1</i>    | 2             | 1.02          |
| <i>TNFSF9</i>  | 1             | 0.05          |
